# Supplementary material
Source: PubMed Central journal article supplement (PMC8595617)
Supplement: NIHMS1738006-supplement-1.pdf [file NIHMS1738006-supplement-1.pdf]

## Supplementary Information

| Parameter            | Value                     | References | Physical Meaning                                          |
|----------------------|---------------------------|------------|-----------------------------------------------------------|
| $p_\phi$             | $2 \times 10^{-7}$ [1/h]  | [1]        | Physiologic collagen production                           |
| $p_{\phi,c}$         | $2 \times 10^{-7}$ [1/h]  | [2]        | Collagen production activated by cytokine                 |
| $p_{\phi,J}$         | $2 \times 10^{-7}$ [1/h]  | [3]        | Collagen production activated by stretch                  |
| $K_{\phi,c}$         | 0.0001 [-]                | [3]        | Saturation of cytokine effect in collagen production rate |
| $K_{\phi,\rho}$      | 1.06 [-]                  | [3]        | Saturation of collagen production by collagen fraction    |
| $d_\phi$             | 0.00097 [1/h]             | [1]        | Collagen degradation                                      |
| $d_{\phi,c}$         | 0.000485 [1/h]            | [1]        | Enhanced collagen degradation by collagen fraction        |
| $\tau_\omega$        | 4.85 [h]                  | [3]        | Time constant for reorientation                           |
| $\tau_\kappa$        | 0.485 [h]                 | [3]        | Time constant for dispersion                              |
| $\gamma^\kappa$      | 2 [-]                     | [3]        | Shape of dispersion rate curve                            |
| $\tau_{\lambda_p^a}$ | $4.85 \times 10^{-7}$ [h] | Estimated  | Time constant for plastic deformation                     |
| $\tau_{\lambda_p^b}$ | $4.85 \times 10^{-7}$ [h] | Estimated  | Time constant for plastic deformation                     |
| $\tau_{\lambda_p^c}$ | $4.85 \times 10^{-7}$ [h] | Estimated  | Time constant for plastic deformation                     |

Table 1: Parameters for the local extracellular matrix model. Parameters listed as estimated were selected in this work or modified from our previous wound healing model [3].

| Parameter      | Value                                          | References | Physical Meaning                    |
|----------------|------------------------------------------------|------------|-------------------------------------|
| $t_\rho$       | $2 \times 10^{-5}$ [MPa]                       | [4]        | Traction                            |
| $t_{\rho,c}$   | $2 \times 10^{-4}$ [MPa]                       | [3, 4]     | Myofibroblast traction              |
| $K_{t,c}$      | 0.0001 [-]                                     | [3]        | Traction saturation due to cytokine |
| $K_t$          | 0.4 [-]                                        | Estimated  | Traction saturation due to collagen |
| $D_{\rho\rho}$ | 0.0833 [mm <sup>2</sup> /h]                    | [5, 6]     | Cell diffusion coefficient          |
| $D_{\rho c}$   | $1.66 \times 10^{-4}$ [mm <sup>5</sup> /mol/h] | [2, 3]     | Chemotaxis coefficient              |
| $D_{cc}$       | 0.01208 [mm <sup>2</sup> /h]                   | [2, 4, 7]  | Cytokine diffusion coefficient      |
| $p_\rho$       | 0.034 [1/h]                                    | [5]        | Cell proliferation                  |
| $p_{\rho,c}$   | 0.0085 [1/h]                                   | Estimated  | Cytokine-increased proliferation    |
| $p_{\rho,J}$   | 0.0085 [1/h]                                   | Estimated  | Mechanoregulation of proliferation  |
| $K_{\rho,c}$   | 0.0001 [-]                                     | [3]        | Proliferation saturation            |
| $d_\rho$       | $p_\rho(1 - \rho_{phys}/K_{\rho\rho})$         | [5]        | Cell death rate                     |
| $K_{\rho\rho}$ | 0.0001 [cells/mm <sup>3</sup> ]                | [5]        | Cell division saturation            |
| $p_{c,\rho}$   | 90e-16/10000 [1/h]                             | [3]        | Cell secretion of cytokine          |
| $p_{c,J}$      | 3e-18 [1/h]                                    | [3]        | Mechanoregulation of cytokine       |
| $K_{c,c}$      | 1 [mol/mm <sup>3</sup> ]                       | [3]        | Cytokine saturation                 |
| $d_c$          | 0.001 [1/h]                                    | Estimated  | Cytokine degradation                |
| $\rho_0$       | 1000 [cells/mm <sup>3</sup> ]                  | [8, 9]     | Dermal cell number                  |
| $c_0$          | 0.0001 [mol/mm <sup>3</sup> ]                  | [3]        | Initial cytokine concentration      |
| $\gamma^{J^e}$ | 5 [-]                                          | [3]        | Shape of mechanosensing curve       |
| $\vartheta^e$  | 2 [-]                                          | [3, 10]    | Midpoint of mechanosensing curve    |

Table 2: Parameters for the global biochemical and biomechanical model. Parameters listed as estimated were selected in this work or modified from our previous wound healing model [3].

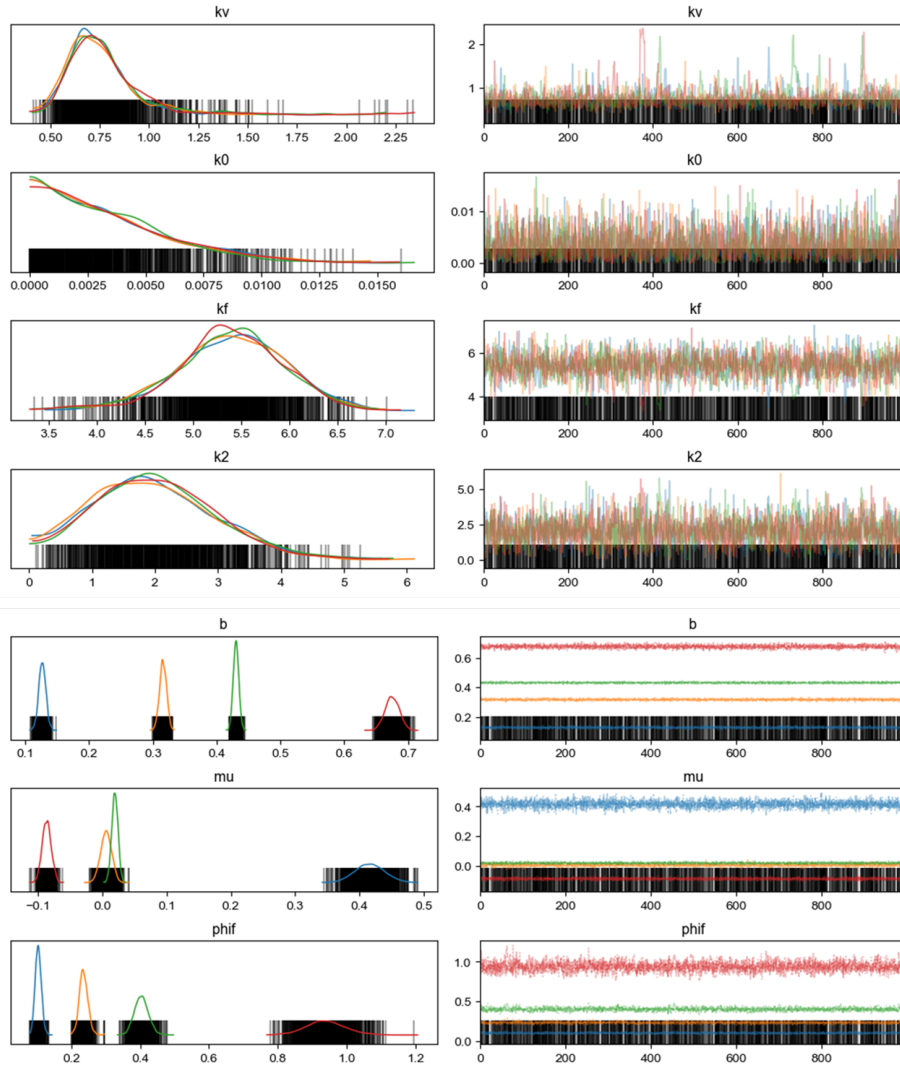

Figure 1: Trace plot of the Monte Carlo Markov Chain. Plots are shown for each of the shared ( $k_v, k_0, k_f, k_2$ ) and unshared ( $b, \mu, \varphi$ ) parameters.

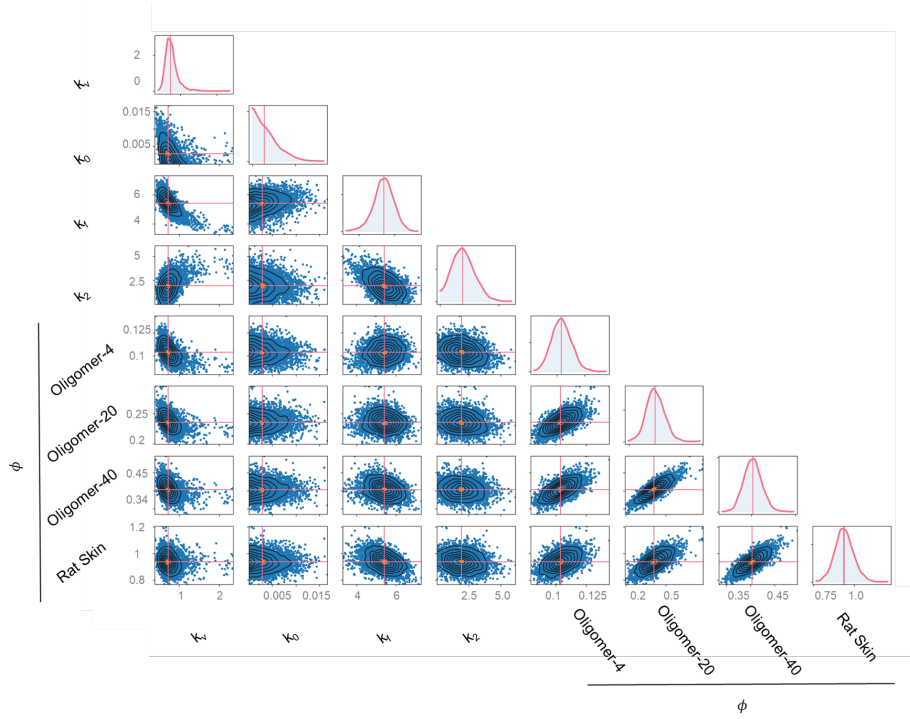

Figure 2: Pair plots of the stiffness parameters and collagen density for collagen scaffolds and rat skin. These parameters are directly linked together through the mechanical constitutive law and density measurements, and indirectly linked to the fiber orientation and dispersion. Covariance exists between  $k_v$  and other material parameters, as well as between the collagen Oligomer density measurements.

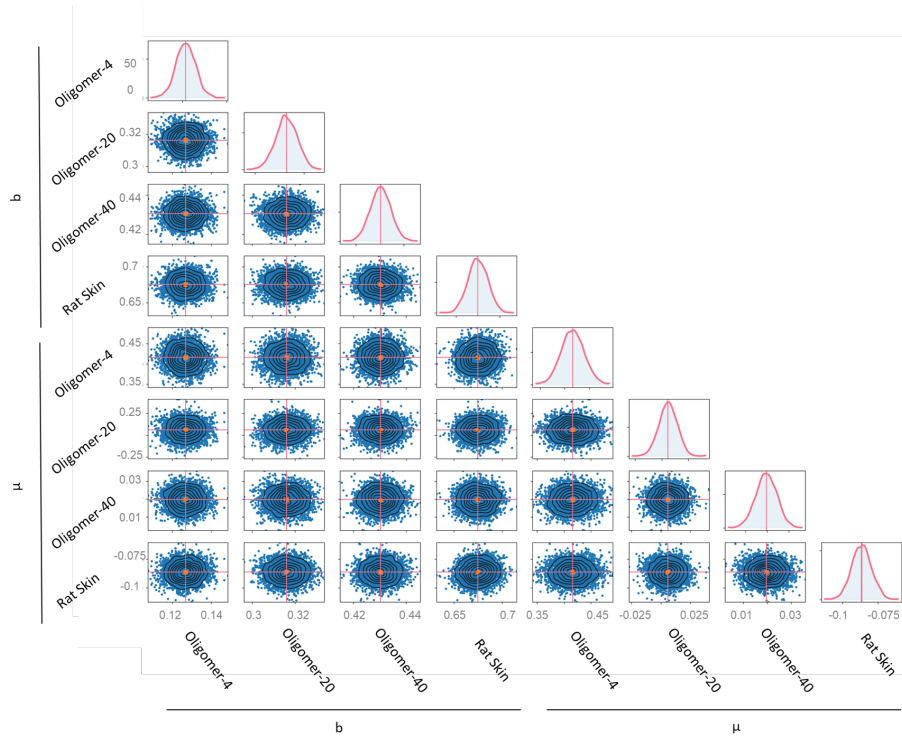

Figure 3: Pair plots of the fiber orientation and dispersion for collagen scaffolds and rat skin. These parameters are directly linked in the Von Mises fiber distribution and indirectly to the mechanical behavior. The plots suggest the parameters are largely independent.

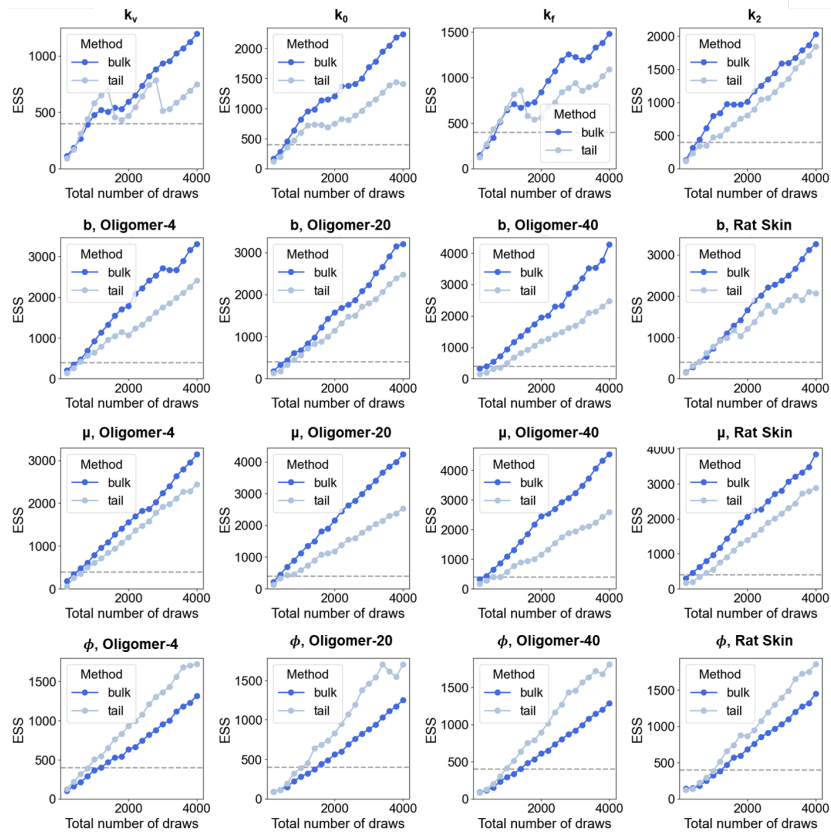

Figure 4: Evolution plot of the effective sample size. All parameters reach an ESS greater than 500, suggesting the chains have converged to their posterior value.

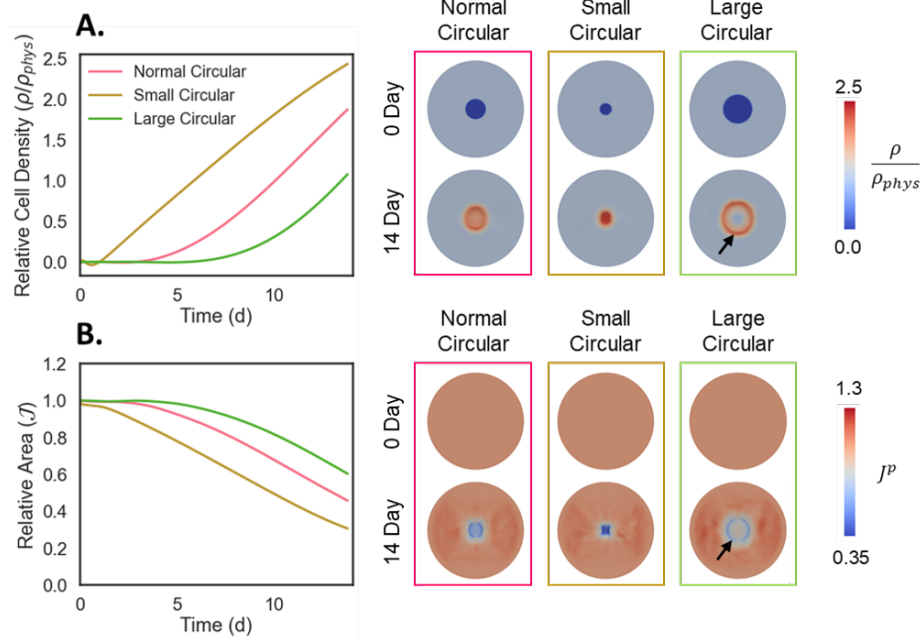

Figure 5: Effect of wound size on A. cellular infiltration in the wound center and B. contraction of isotropic Oligomer-40 treated wounds. Larger (2x) volume wounds undergo slower cellularization and contract moderately slower than smaller (1/2) volume wounds. This contraction is more evident at the wound border where the cells have successfully migrated.

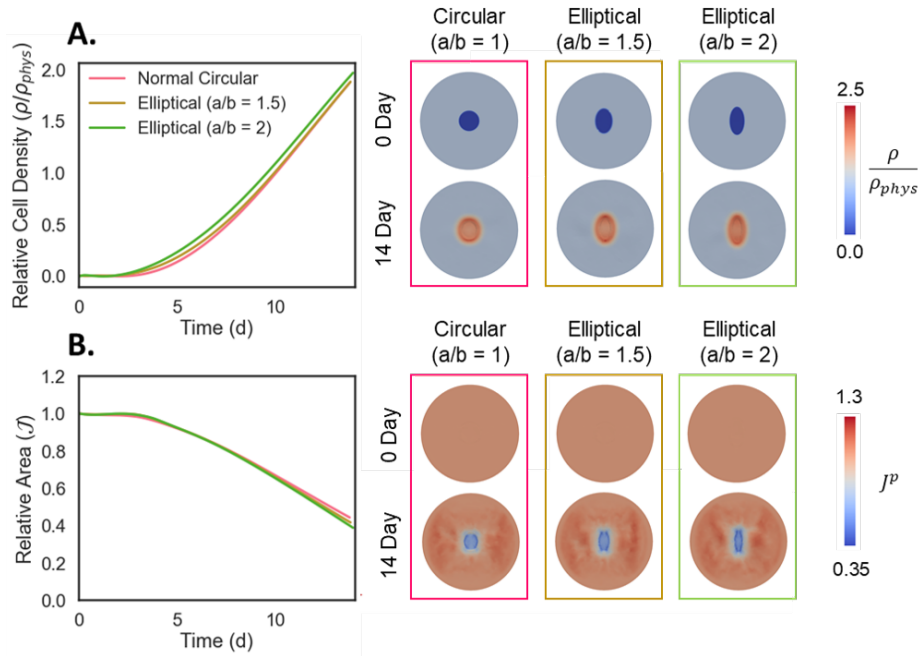

Figure 6: Effect of wound ellipticity on A. cellular infiltration in the wound center and B. contraction of isotropic Oligomer-40 treated wounds. Elliptical wounds have the same volume as circular wounds, but greater surface area at the interface between wound and surrounding skin tissue. The increase in surface area with ellipticity leads to somewhat faster recellularization and contraction, but to a small degree.

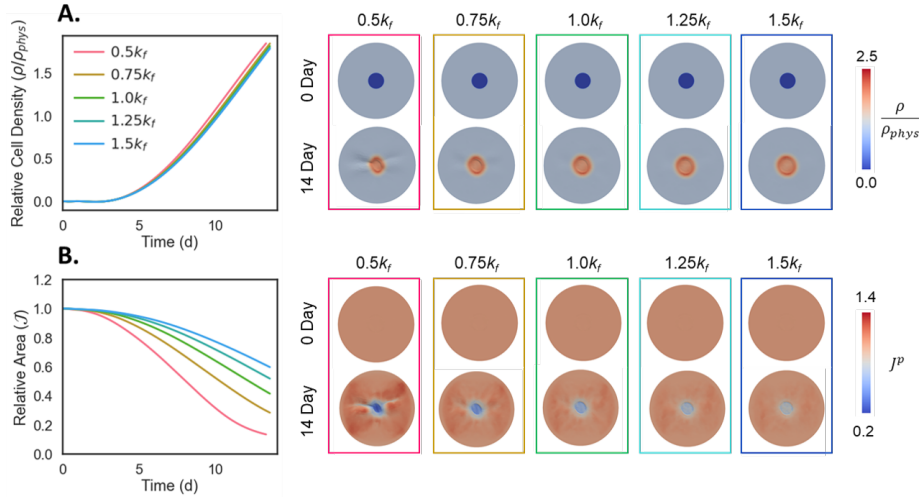

Figure 7: Effect of collagen stiffness on A. cellular infiltration in the wound center and B. contraction of isotropic Oligomer-40 treated wounds. Increasing collagen stiffness leads to significantly less contraction. Cellularization was not significantly affected by the change of collagen stiffness. This range of  $k_f$  is motivated in part by the possible uncertainty in material properties from the experimental setup, as well as inherent variability of material behavior of biological tissue. For example, uniaxial tests of murine, porcine, and human skin at different strain rates spanning three orders of magnitude have identified a relatively small change in the estimated modulus (1- to 3-fold change in estimated modulus) [11, 12, 13]. Note that all other parameters except  $k_f$  were kept constant and set to the values in Table S1.



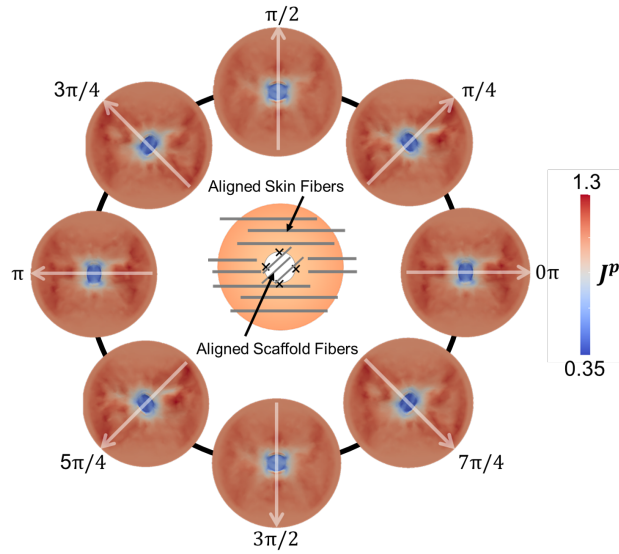

Figure 8: Effect of collagen scaffold fiber orientation on wound contraction. Skin fibers are maintained in a horizontal direction,  $\mu_a = 0$  with alignment  $\kappa = 0.2$  as in Figure 8, while collagen scaffold fibers are rotated from 0 to  $2\pi$ . Due to the symmetry of the problem, after the first three cases, from 0 to  $\pi/2$ , the rest of the contours are equivalent to one of the first three cases. This shows that the code preserves these symmetries and that there are no mesh dependencies. As the scaffold fibers are rotated, the contracted wound shape rotates as well. This is due to the active stress term in eq. 11, which assumes that fibroblasts exert contractile forces primarily along the preferred fiber orientation with dispersion  $\kappa$ .

## References

- [1] G. Laurent, Dynamic state of collagen: pathways of collagen degradation in vivo and their possible role in regulation of collagen mass, *American Journal of Physiology-Cell Physiology* 252 (1) (1987) C1–C9.
- [2] B. D. Cumming, D. McElwain, Z. Upton, A mathematical model of wound healing and subsequent scarring, *Journal of The Royal Society Interface* 7 (42) (2010) 19–34.
- [3] A. Buganza Tepole, Computational systems mechanobiology of wound healing, *Computer Methods in Applied Mechanics and Engineering* 314 (2017) 46–70.
- [4] D. C. Koppenol, F. J. Vermolen, F. B. Niessen, P. P. van Zuijlen, K. Vuk, A mathematical model for the simulation of the formation and the subsequent regression of hypertrophic scar tissue after dermal wounding, *Biomechanics and Modeling in Mechanobiology* 16 (1) (2017) 15–32.
- [5] C. Valero, E. Javierre, J. M. García-Aznar, M. J. Gómez-Benito, A cell-regulatory mechanism involving feedback between contraction and tissue formation guides wound healing progression, *PloS One* 9 (3) (2014).
- [6] K. Ghosh, Z. Pan, E. Guan, S. Ge, Y. Liu, T. Nakamura, X.-D. Ren, M. Rafailovich, R. A. Clark, Cell adaptation to a physiologically relevant ecm mimic with different viscoelastic properties, *Biomaterials* 28 (4) (2007) 671–679.
- [7] K. E. Murphy, C. L. Hall, P. K. Maini, S. W. McCue, D. S. McElwain, A fibrocontractive mechanochemical model of dermal wound closure incorporating realistic growth factor kinetics, *Bulletin of Mathematical Biology* 74 (5) (2012) 1143–1170.
- [8] C. Miller, G. Godeau, C. Lebreton-DeCoster, A. Desmouliere, B. Pellat, L. Dubertret, B. Coulomb, Validation of a morphometric method for evaluating fibroblast numbers in normal and pathologic tissues, *Experimental Dermatology* 12 (4) (2003) 403–411.
- [9] E. Rognoni, A. O. Pisco, T. Hiratsuka, K. H. Sipilä, J. M. Belmonte, S. A. Mobasser, C. Philippeos, R. Dilão, F. M. Watt, Fibroblast state switching orchestrates dermal maturation and wound healing, *Molecular Systems Biology* 14 (8) (2018) e8174.
- [10] A. Buganza Tepole, C. J. Ploch, J. Wong, A. K. Gosain, E. Kuhl, Growing skin: A computational model for skin expansion in reconstructive surgery, *Journal of the Mechanics and Physics of Solids* 59 (10) (2011) 2177–2190.
- [11] O. A. Shergold, N. A. Fleck, D. Radford, The uniaxial stress versus strain response of pig skin and silicone rubber at low and high strain rates, *International Journal of Impact Engineering* 32 (9) (2006) 1384–1402.

- [12] M. Ottenio, D. Tran, A. N. Annaidh, M. D. Gilchrist, K. Bruyère, Strain rate and anisotropy effects on the tensile failure characteristics of human skin, *Journal of the mechanical behavior of biomedical materials* 41 (2015) 241–250.
- [13] A. Pissarenko, W. Yang, H. Quan, K. A. Brown, A. Williams, W. G. Proud, M. A. Meyers, Tensile behavior and structural characterization of pig dermis, *Acta biomaterialia* 86 (2019) 77–95.
